# Supplementary material for: Transgenic Resistance Confers Effective Field Level Control of Bacterial Spot Disease in Tomato
Source: PLoS One. 2012 Aug 1;7(8):e42036. doi: 10.1371/journal.pone.0042036 (PMC3411616; doi:10.1371/journal.pone.0042036)
Supplement: Table S4 — Comparison of bacterial spot disease severity in tomato lines in Florida field trials. (DOCX) [file pone.0042036.s004.docx]

**Table S4: Comparison of bacterial spot disease severity in tomato lines in Florida field trials.**

|  | **Fall 2006 Citra** | **Fall 2007 Citra** | **Fall 2007 Balm1** | **Overall** |
| --- | --- | --- | --- | --- |
| **Plant Line** | **Mean2** | **Mean** | **Mean** | **Mean** |
| VF 36-Bs2 x 216 | 1.2E | 2.0D | 3.6EF | 2.3F |
| VF 36-Bs2 (homo) | 1.0E | 2.0D | 4.0E | 2.3F |
| VF 36-Bs2 (hemi) | 1.0E | 2.0D | 4.0E | 2.3F |
| PI 114490 | 2.7D | 4.7C | 3.4F | 3.6E |
| Fla. 8517 | 4.0CD | 4.5C | 3.9EF | 4.1DE |
| HI7981 | 4.5BC | 4.5C | 5.4D | 4.8CD |
| HI7998 | 4.5BC | 4.5C | 5.6CD | 4.9CD |
| FL216 | 5.2A-C | 5.2C | 6.0BC | 5.5BC |
| Fla. 8233 | 5.0A-C | 6.5B | 5.6CD | 5.7B |
| Fla47 | 5.2A-C | 8.0A | 5.5CD | 6.2AB |
| Fla. 8000 | 4.0CD | 8.0A | 5.7B-D | 6.6A |
| Fla. 8044 | 6.0AB | 7.5A | 6.2B | 6.6A |
| VF 36 | 6.5A | 7.5A | 7.0A | 7.0A |

1 *Alternaria* present in this trial produced bacterial spot-like disease symptoms and higher than typical scores, including on Bs2 lines.

**2** Disease severity scores were determined using the Horsfall-Barratt scale (Fig. 1). Treatment differences were determined using the Waller-Duncan T-test (p<0.05). Mean values with identical letters were not significantly different.
