# Supplementary material for: Transgenic Resistance Confers Effective Field Level Control of Bacterial Spot Disease in Tomato
Source: PLoS One. 2012 Aug 1;7(8):e42036. doi: 10.1371/journal.pone.0042036 (PMC3411616; doi:10.1371/journal.pone.0042036)
Supplement: Table S6 — Combined field trial analysis for Balm, FL. (DOCX) [file pone.0042036.s006.docx]

**Table S6: Combined field trial analysis for Balm, FL.**

|  | **2007-2010**1 | | |
| --- | --- | --- | --- |
|  | **Disease rating2,3** | **Marketable Yield (kg)3,4** | **Total Yield (kg)3,4** |
| **Plant Line** |  |  |  |
| VF 36-Bs2 (homo) | 1.9D | 1.27B | 1.92B |
| VF 36-Bs2 (hemi) | 2.0D | 1.26B | 1.91B |
| Fla91 | 4.9C | 1.40B | 1.89B |
| Sanibel | 5.0C | 1.80A | 2.56A |
| Fla47 | 5.0C | 1.54AB | 2.08B |
| Sebring | 6.0B | 1.49AB | 1.94B |
| VF 36 | 6.6A | 0.57C | 1.11C |

1 Combined analysis of 2007-2010 data presented in Table S5.

2 Disease severity scores were determined using the Horsfall-Barratt scale (Fig. 1).

3 Treatment differences were determined using the Waller-Duncan T-test (p<0.05). Mean values with identical letters were not significantly different.

4 Yields are kg per plant. Marketable yield is medium, large, and extra large fruit. Total yield is all fruit including small fruit and culls.
